# Supplementary material for: Single oxygen generation sensitized by spiro(dipyridinogermole)(dithienogermole)s
Source: Royal Society of Chemistry journal article supplement (doi:10.1039/c6dt02767a), 2016-01-01
Supplement: c6dt02767a1.pdf [file c6dt02767a1.pdf]

Supporting Information

Single Oxygen Generation Sensitized by  
Spiro(dipyridinogermole)(dithienogermole)s

J. Ohshita,\* Yuya Hayashi, Kazuya Murakami, Toshiaki Enoki, and Yousuke Ooyama  
*Department of Applied Chemistry, Graduate School of Engineering, Hiroshima University, Higashi-Hiroshima 739-8527, Japan. E-mail: jo@hiroshima-u.ac.jp*

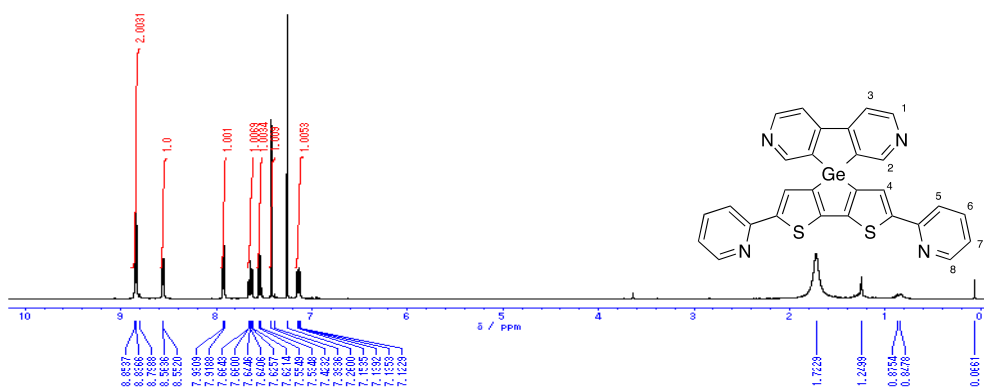

• **Figure S-1.** <sup>1</sup>H NMR Spectrum of 3 (CDCl<sub>3</sub>)

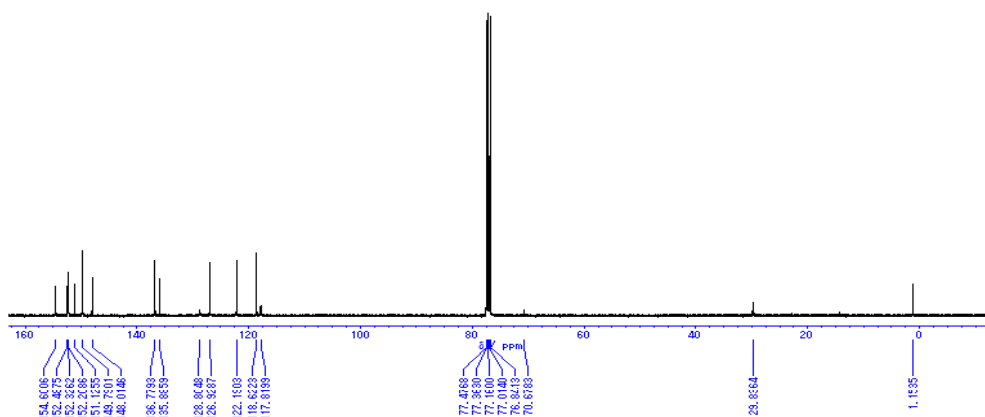

• **Fig. S2.** <sup>13</sup>C NMR Spectrum of 3 (CDCl<sub>3</sub>)

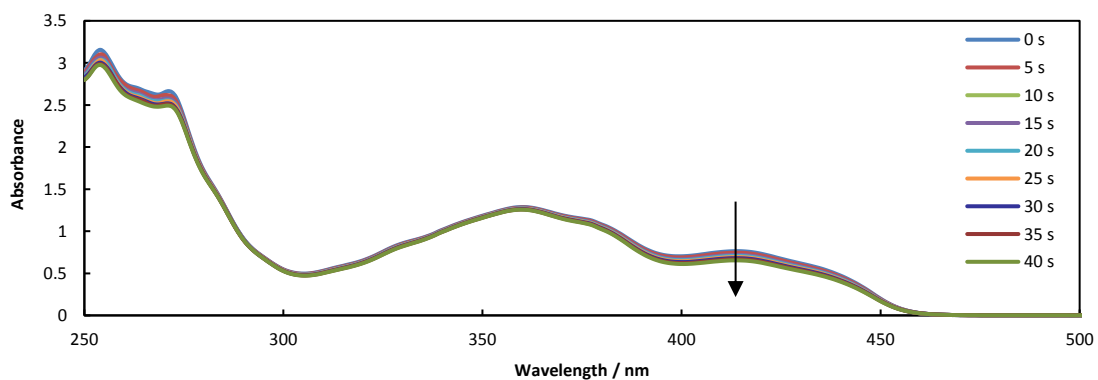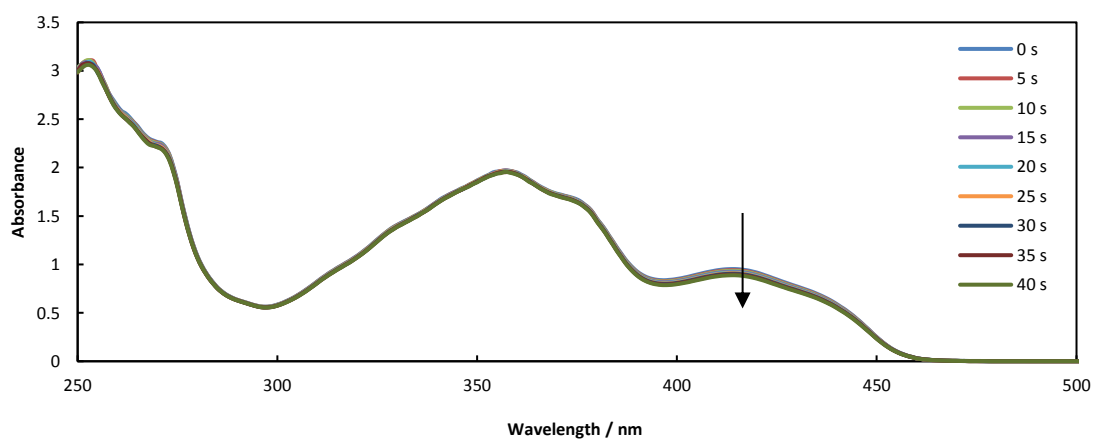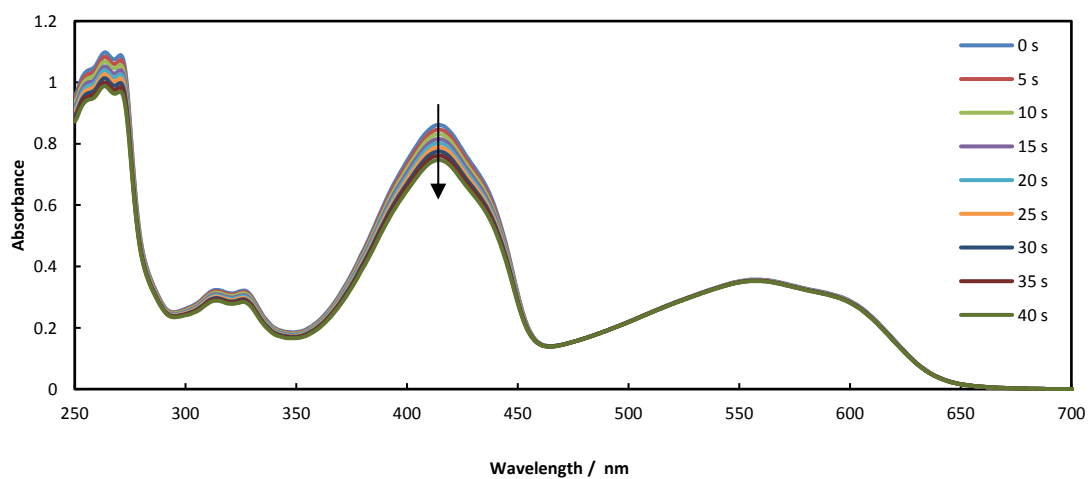

• **Fig. S-3.** Changes of UV-vis absorption spectra of a solution of **1** (top), **4** (middle) and **5** (bottom) containing DPBF as a  $^1\text{O}_2$  scavenger in air-saturated dichloromethane upon irradiation at 390 nm for **1** and **4**, and 509 nm for **5**.

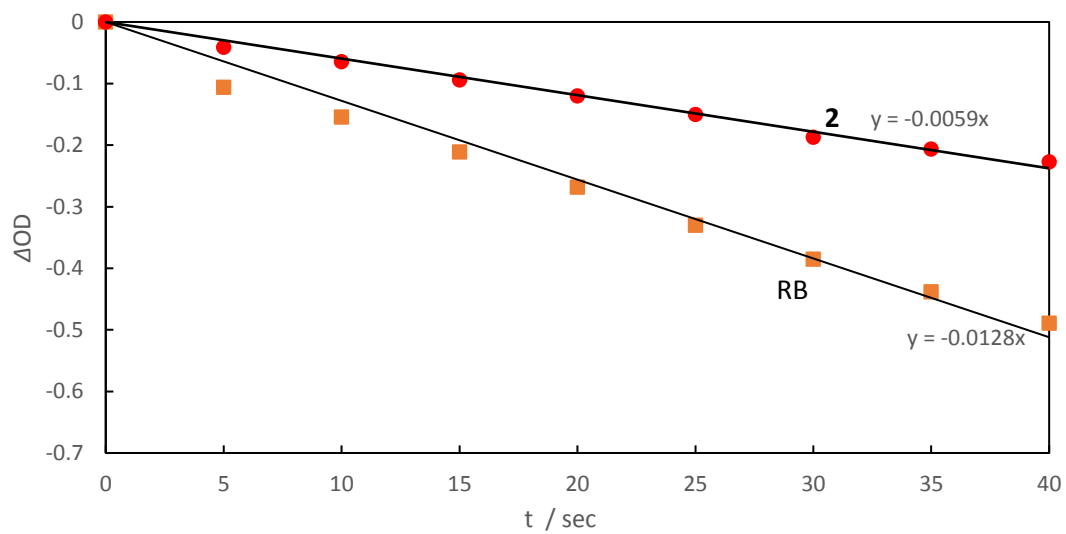

• **Fig. S-4.** Plots of  $\Delta\text{OD}$  of DPBF at 414 nm versus irradiation time for the solutions of **2** and RB in acetonitrile ( $\lambda_{\text{ex}} = 509 \text{ nm}$ ).
